# Supplementary material for: From Local to Global Dilemmas in Social Networks
Source: PubMed Central journal article supplement (PMC3283728; doi:10.1371/journal.pone.0032114), 2012-02-21
Supplement: pone.0032114.s001.pdf [file pone.0032114.s001.pdf]

## SUPPORTING INFORMATION – TEXT S1

### From Local to Global Dilemmas in Social Networks

Flávio L. Pinheiro<sup>1</sup>, Jorge M. Pacheco<sup>2,1</sup> and Francisco C. Santos<sup>3,1, ‡</sup>

<sup>1</sup> ATP-group, CMAF, Instituto para a Investigação Interdisciplinar, P-1649-003 Lisboa Codex, Portugal.

<sup>2</sup> Departamento de Matemática e Aplicações, Universidade do Minho, 4710 - 057 Braga, Portugal.

<sup>3</sup> Departamento de Engenharia Informática, Instituto Superior Técnico, Av. Rovisco Pais, 1, 1049-001

Lisboa, Portugal.

---

<sup>‡</sup> **Corresponding Author:** Francisco C. Santos, ATP-Group, Centro de Matemática e Aplicações Fundamentais, Complexo Interdisciplinar da Universidade de Lisboa, Av. Prof. Gama Pinto, 2, 1649-003 Lisboa, Portugal, email: xsantos@gmail.com; tel: +351.21.7904891; fax: +351.21.7954288/89

## Evolutionary steady states in homogeneous networks

As we argue in the main text, the shape of the time independent  $G^A(j)$  obtained for homogeneous networks indicates that these topologies induce a co-existence game dynamics in a population of individuals engaging in a Prisoner's Dilemma (**PD**). Moreover, the stationary regime is associated with the interior root of  $G^A(j)$ . Thus, it is reasonable to expect that the stable roots of  $G^A(j)$  will coincide with the steady states obtained from computer simulations carried out on the same networks.

In [Fig. S1](#) we compare the interior roots of  $G^A(j)$  (circles) with the stationary states (lines) obtained via computer evolutions [\[1-5\]](#) carried out for several values of the benefit  $B$  and for homogenous networks, ranging from ordered lattices (*Lattice*) to random networks (*HoRand*). [Fig. S1](#) confirms that the information offered by  $G^A(j)$  remains valid and strikingly accurate for a broad range of game parameters for both types of networks. In accord with the results in the main text, the stationary states were computed for networks with  $N=1000$  individuals and an average connectivity of  $z=4$ . As before, each individual revise his or her strategy adopting the one of a randomly selected neighbour with probability given by the Fermi function (see [Methods](#)) [\[2,6\]](#). Each equilibrium fraction of cooperators in a simulation was obtained by averaging over 500 generations after a transient period of  $10^4$  generations starting from 50% of  $C$ s randomly placed on the network. Both red and black lines in [Fig. S1](#) correspond to a subsequent average over  $10^4$  simulations.

$G^A(j)$  and its interior roots (full circles in [Fig. S1](#)) were computed for the same game and network parameters by averaging  $G^A(j,t)$  over 100 generations after a transient of 50 generations (see [Methods](#) for details of computation of  $G^A(j,t)$ ).

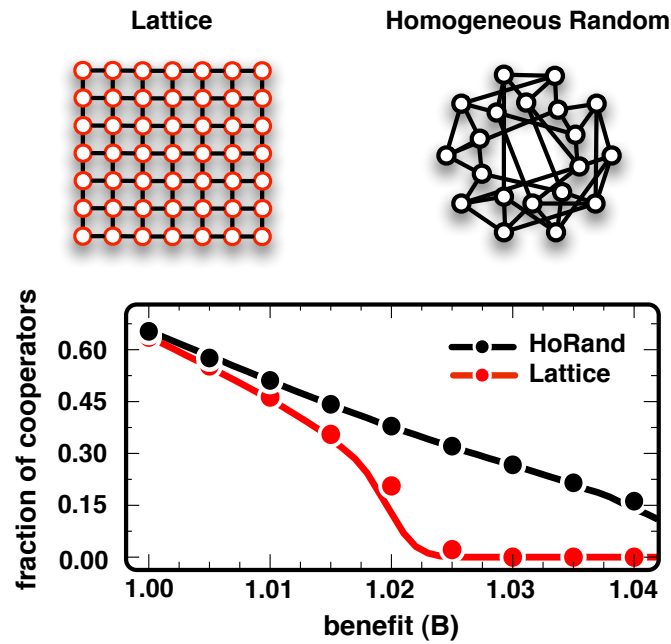

**Fig.S1.** Evolutionary dynamics cooperation in homogeneous networks. We plot the interior roots  $x_R$  of  $G^A(j)$  (circles) for a **PD** ( $T=B$ ,  $R=I$ ,  $P=0$ ,  $S=I-B$ ) in homogeneous networks, from random networks (black circles) to ordered lattices (red circles), as a function of the benefit  $B$ .  $G^A(j)$  indicates that the population evolves towards a stationary fraction  $x_R$  of **Cs**. This is confirmed by the stationary states (lines) obtained via computer simulations starting from 50% of **Cs** and **Ds** randomly placed in each network. ( $N=10^3$ ,  $k=4$  and  $\beta=0.1$ ).

## References

1. Nowak MA, May RM (1992) Evolutionary games and spatial chaos. *Nature* 359 826-829.
2. Szabó G, Toke C (1998) Evolutionary prisoner's dilemma game on a square lattice. *Phys Rev E* 58 69-73.
3. Santos FC, Rodrigues JF, Pacheco JM (2005) Epidemic spreading and cooperation dynamics on homogeneous small-world networks. *Phys Rev E* 72 (5 Pt 2): 056128.
4. Hauert C, Szabó G (2005) Game theory and physics. *Am J Phys* 73 (5): 405-414.
5. Szabó G, Fáth G (2007) Evolutionary games on graphs. *Phys Rep* 446 (4-6): 97-216.
6. Traulsen A, Nowak MA, Pacheco JM (2006) Stochastic dynamics of invasion and fixation. *Phys Rev E* 74 (1 Pt 1): 011909.
